# Supplementary material for: Randomized trial of two artificial intelligence coaching interventions to increase physical activity in cancer survivors
Source: PubMed Central journal article supplement (PMC8660785; doi:10.1038/s41746-021-00539-9), 2021-12-09
Supplement: 41746_2021_539_MOESM1_ESM.pdf [file 41746_2021_539_MOESM1_ESM.pdf]

# Supplemental materials

Supplemental Figure 1: MyCoach design

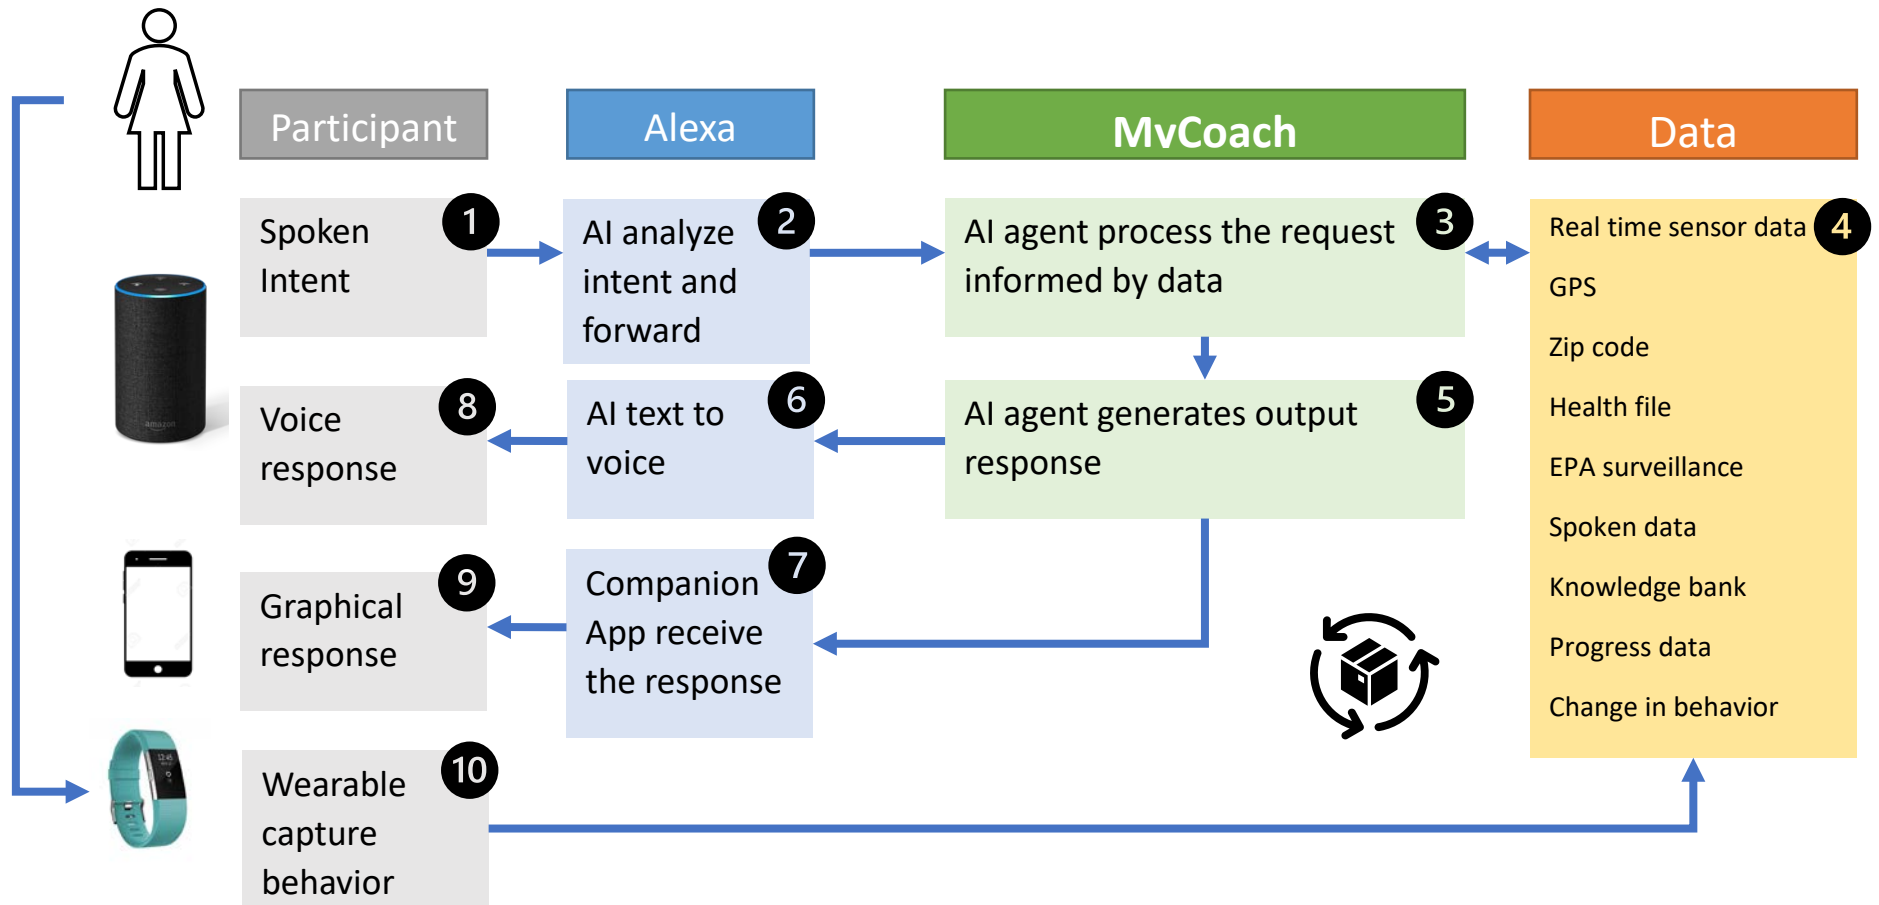

Supplemental Figure 2: SmarText design

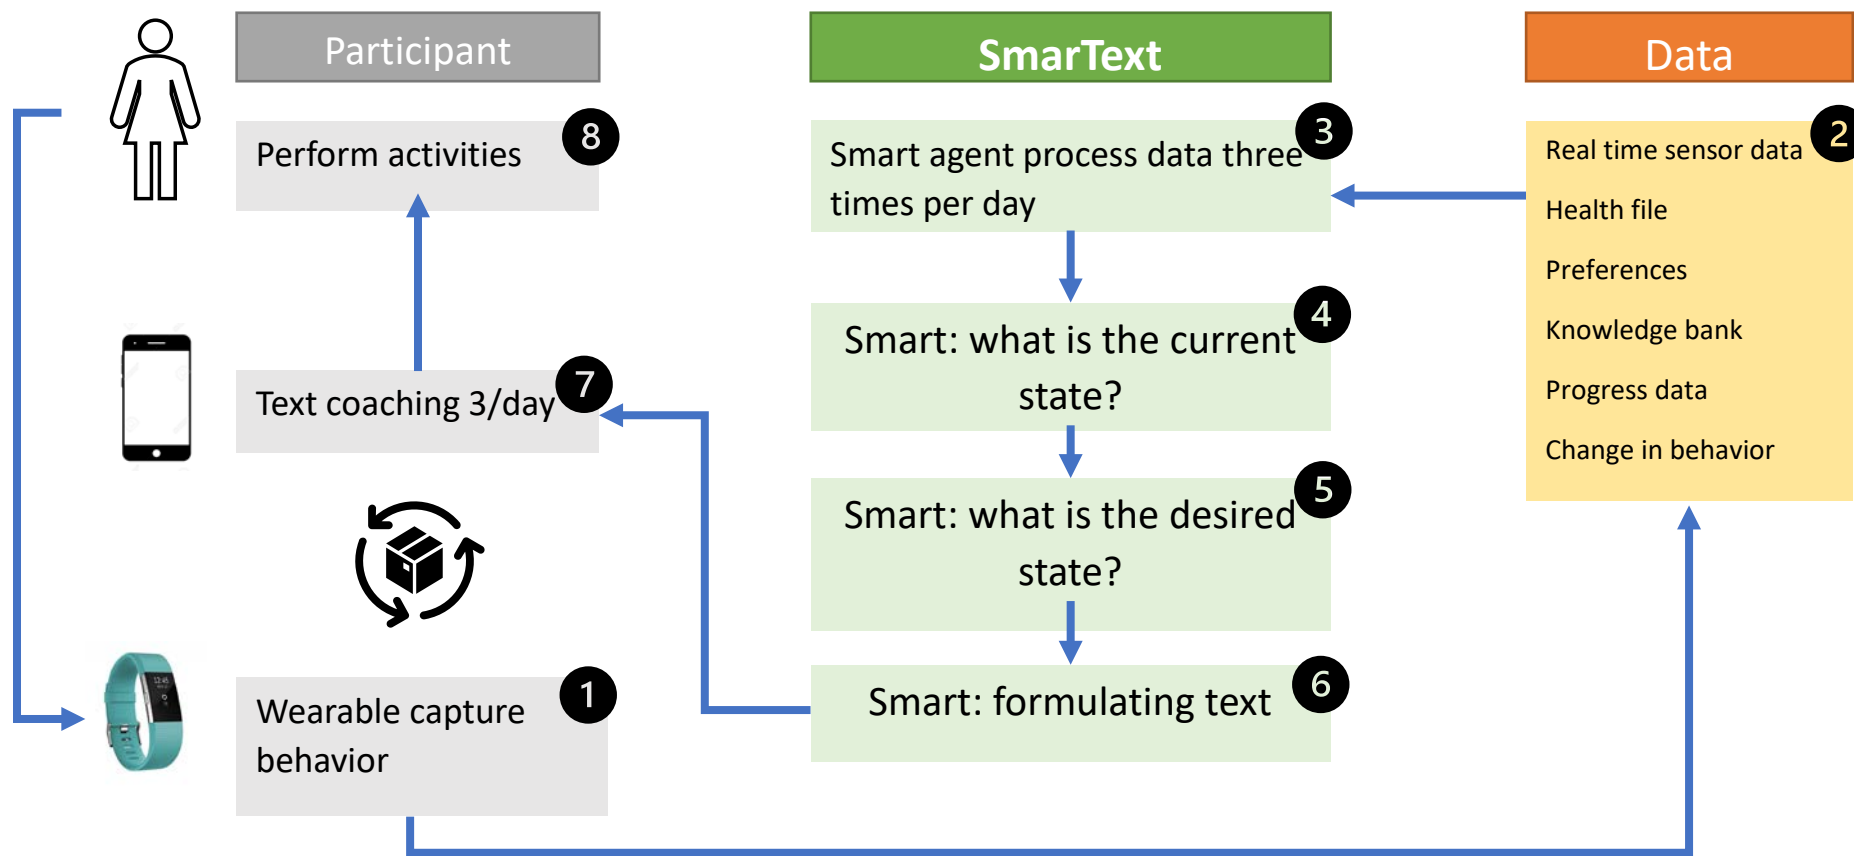

Supplemental Figure 3: CONSORT Flow Diagram for PATH Trial

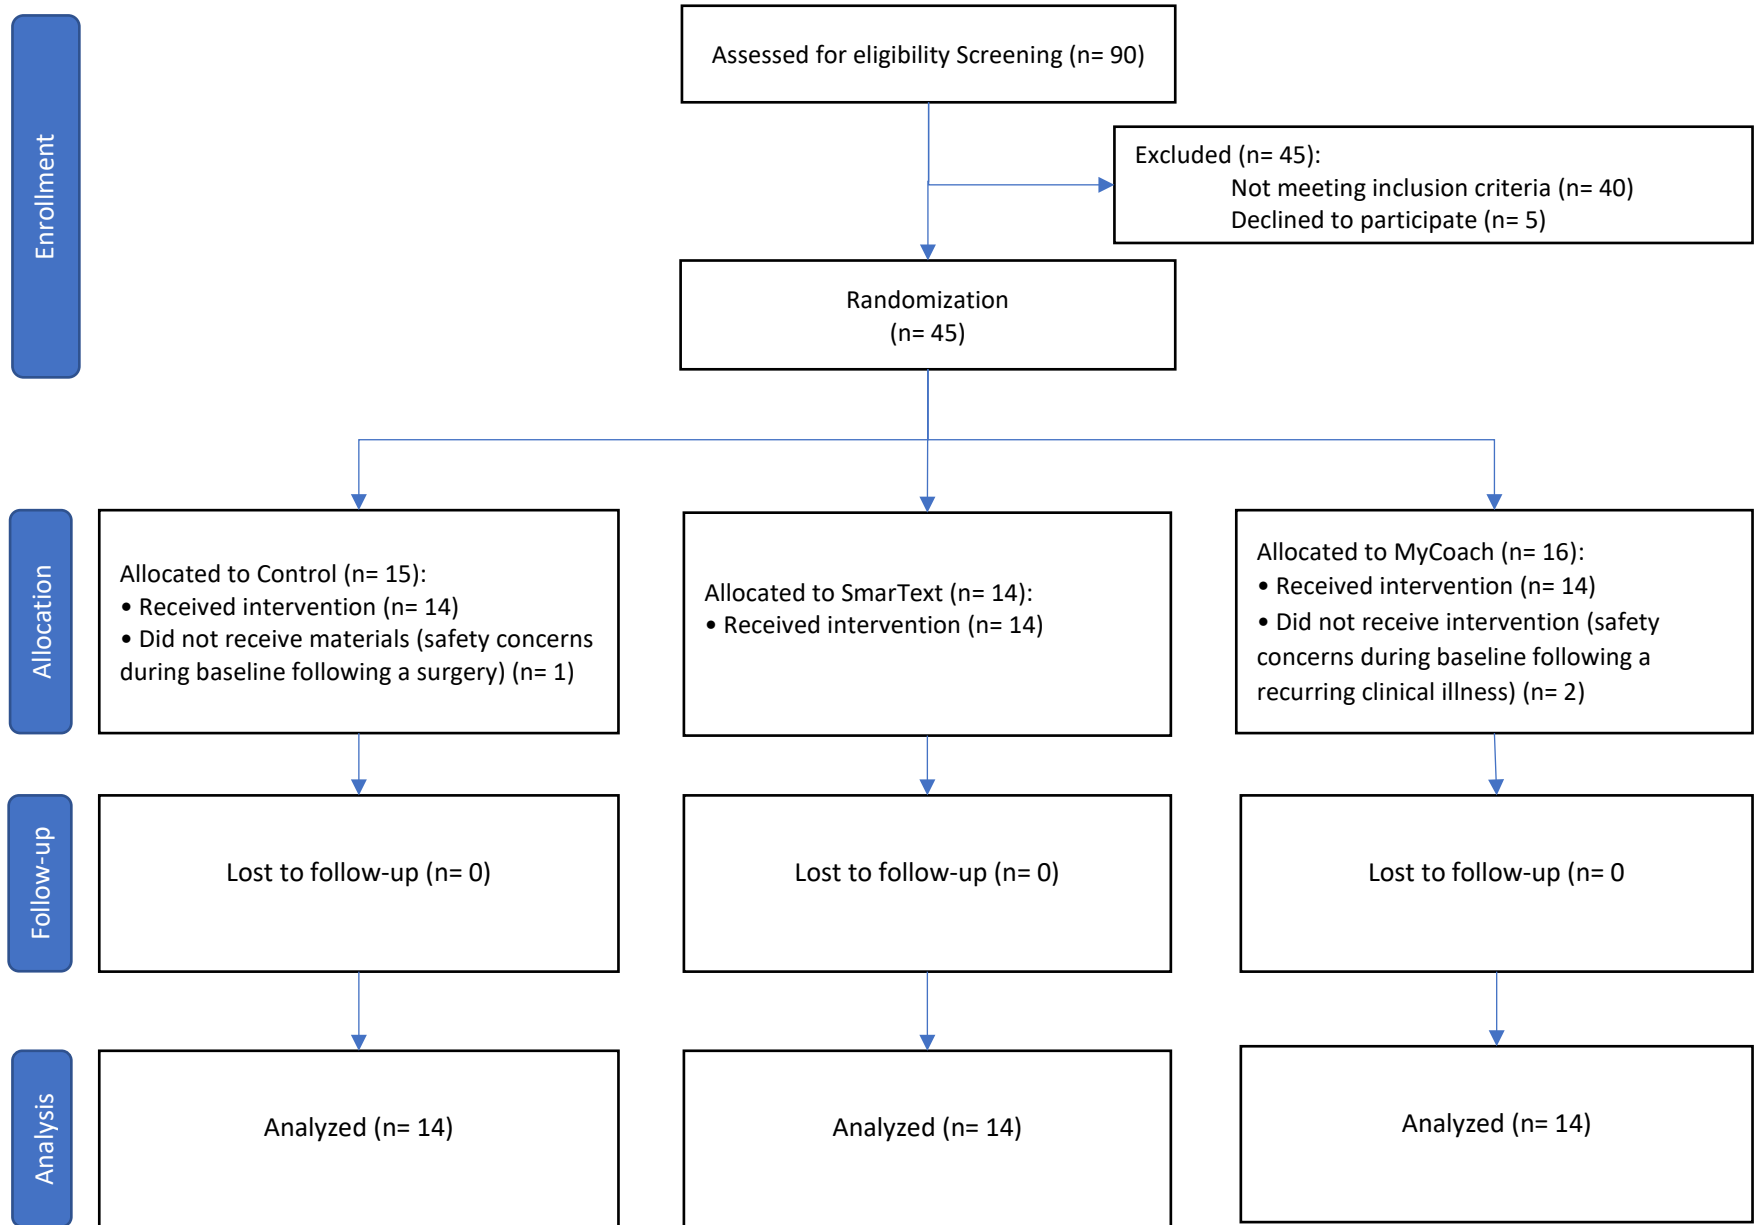

Supplemental Table 1: Summary comparison of each arm in the trial

| # |                                            | Control                                                                                                  | SmartText                                                | MyCoach                                                  |
|---|--------------------------------------------|----------------------------------------------------------------------------------------------------------|----------------------------------------------------------|----------------------------------------------------------|
| 1 | Approach                                   | Print and electronic educational materials about the benefit of physical activities for cancer survivors | Autonomous text messages                                 | On demand coaching via voice assist                      |
| 2 | Contents                                   | NCI educational materials                                                                                | Behavioral coaching contents developed by the study team | Behavioral coaching contents developed by the study team |
| 3 | Coaching messages/responses                | NCI recommendation on physical activities                                                                | Autonomous formulation by the goal-based agent           | On demand formulation by unsupervised goal-based agent   |
| 4 | Frequency                                  | One time                                                                                                 | Three times per day                                      | On demand based on user's intent                         |
| 5 | Data collection                            | Sensor                                                                                                   | Sensor                                                   | Sensor                                                   |
| 6 | Recommended target for physical activities | 10,000 steps per day                                                                                     | 10,000 steps per day                                     | 10,000 steps per day                                     |

Supplemental List: Additional data collected during the trial

- total number and duration of activity bouts (defined as 3 minutes or more of uninterrupted activity); 2)
- fragmentation indices (counting transitions between active/inactive periods) and variability indices (counting the magnitude of transitions between different levels of physical activity)
- daily diurnal patterns of activity that model patterns in minute-by-minute profiles
- heart rate and sleep data were captured. Subjected to additional user's permission to share.
